# Supplementary material for: AP-1 subunits converge promiscuously at enhancers to potentiate transcription
Source: HighWire-hosted journal article supplement (doi:10.1101/gr.267898.120), 2021-03-05
Supplement: Supplemental_Table_S1.xlsx [file Supplemental_Table_S1.xlsx]

## Sheet: Table1
	Table 1, Guide RNAs used in this study
	Gene Target	Guide alias	Spacer	Cut-Stop codon Distance	Cas Effector	Sense Oligo	Anti Sense Oligo
	NR3C1, GR	g1	TAAGGCAACCATTCTTATTA	12 nt	SpCas9	caccgTAAGGCAACCATTCTTATTA	AAACTAATAAGAATGGTTGCCTTAC
		g2	ATCAAAAGTGACTGCCTTAATAA	15 nt	LbCas12a	agatATCAAAAGTGACTGCCTTAATAA	AAAATTATTAAGGCAGTCACTTTTGAT
	JUN	g1	ACATTTTGAAGAGAGACCGT	11 nt	SpCas9	caccgACATTTTGAAGAGAGACCGT	AAACACGGTCTCTCTTCAAAATGTC
		g2	GAAGAGAGACCGTCGGGGGCTGA	18 nt	LbCas12a	agatGAAGAGAGACCGTCGGGGGCTGA	AAAATCAGCCCCCGACGGTCTCTCTTC
	JUNB	g1	GGGCAGGGGACGTTCAGA	1 nt	SpCas9	caccgGGGCAGGGGACGTTCAGA	AAACTCTGAACGTCCCCTGCCCC
	JUND	g1	CCGCGCGCGGACTCAGTACG	2 nt	SpCas9	caccgCCGCGCGCGGACTCAGTACG	AAACCGTACTGAGTCCGCGCGCGGC
		g2	CCGCGTACTGAGTCCGCGCG	9 nt	SpCas9	caccgCCGCGTACTGAGTCCGCGCG	AAACCGCGCGGACTCAGTACGCGGC
		g3	GACTCAGTACGCGGGCACC	10 nt	SpCas9	caccgGACTCAGTACGCGGGCACC	AAACGGTGCCCGCGTACTGAGTCC
	FOS	g1	CCCTTCCCTGCCCCCTCACA	1 nt	SpCas9	caccgCCCTTCCCTGCCCCCTCACA	AAACTGTGAGGGGGCAGGGAAGGGC
		g2	ACGCTGCTGGCCCTGTGAGG	2 nt	SpCas9	caccgACGCTGCTGGCCCTGTGAGG	AAACCCTCACAGGGCCAGCAGCGTC
		g3	CTGGCCCTGTGAGGGGGCA	7 nt	SpCas9	caccgCTGGCCCTGTGAGGGGGCA	AAACTGCCCCCTCACAGGGCCAGC
	FOSB	g1	CGCTCTGTGAACTCTTTAGA	4 nt	SpCas9	caccgCGCTCTGTGAACTCTTTAGA	AAACTCTAAAGAGTTCACAGAGCGC
		g2	TGTGTCTAAAGAGTTCACAGAGC	0 nt	LbCas12a	caccgAAAGAGTTCACAGAGCGAGG	AAACCCTCGCTCTGTGAACTCTTTC
	FOSL1	g1	CCAACCCTCCTCGCTTTGTG	1 nt	SpCas9	caccgCCAACCCTCCTCGCTTTGTG	AAACCACAAAGCGAGGAGGGTTGGC
		g2	CTCAGGCGCCTCACAAAGCG	4 nt	SpCas9	caccgCTCAGGCGCCTCACAAAGCG	AAACCGCTTTGTGAGGCGCCTGAGC
	FOSL2	g1	TTACAGAGCCAGCAGAGTGG	14 nt	SpCas9	caccgTTACAGAGCCAGCAGAGTGG	AAACCCACTCTGCTGGCTCTGTAAC
