# Supplementary material for: AP-1 subunits converge promiscuously at enhancers to potentiate transcription
Source: HighWire-hosted journal article supplement (doi:10.1101/gr.267898.120), 2021-03-05
Supplement: Supplemental_Table_S2.xlsx [file Supplemental_Table_S2.xlsx]

## Sheet: Table2
	Table 2, Primers used in this study
	Primer Name	Sequence	Function
	NR3C1_gDNAL_FWD	CAGAACTGGCAGCGGTTTTA	Amplification from gDNA
	NR3C1_gDNAL_REV	ACTGCTTCTGTTGCCAAGTC	Amplification from gDNA
	NR3C1_gDNAR_FWD	CATGAGATGTTCCCACTGACC	Amplification from gDNA
	NR3C1_gDNAR_REV	AGAAGCACCAACCCATTTTCA	Amplification from gDNA
	NR3C1_Larm_FWD	AacgacggccagtgaattcgagctcggtacCAGAACTGGCAGCGGTTTTA	Adding Gibson Homology
	NR3C1_LarmREV_FLAG	ATCACCTTTGTCATCATCATCTTTATAatcCTTTTGATGAAACAGAAGTTTTTTGATATT	Adding Gibson Homology
	NR3C1_Rarm_FWD	GCTGGGGATGCGGTAGGCTCTATGGataacttcgtataatgtatgctatacgaagttatctCTGCCTTAATAAGAATGGTTGCC	Adding Gibson Homology
	NR3C1_Rarm_REV	caggaaacagctatgaccatgCTCGAGccaAGCACCAACCCATTTTCACA	Adding Gibson Homology
	JUND_gDNAL_FWD	GACCTGGGGCTGCTGAAG	Amplification from gDNA
	JUND_gDNAL_REV	AGGAAAGGCAGGGTTTGAGG	Amplification from gDNA
	JUND_gDNAR_FWD	CATCGACATGGACACGCAG	Amplification from gDNA
	JUND_gDNAR_REV	TCTCTGCTCCCTCCAACAAG	Amplification from gDNA
	JUND_Larm_FWD	AacgacggccagtgaattcgagctcggtacGACGAGCTCACAGTTCCTCT	Adding Gibson Homology
	JUND_LarmREV_FLAG	ATCACCTTTGTCATCATCATCTTTATAatcGTACGCGGGCACCTGGT	Adding Gibson Homology
	JUND_Rarm_FWD	GCTGGGGATGCGGTAGGCTCTATGGataacttcgtataatgtatgctatacgaagttatctGTCCGCGCGCGGGGCGCA	Adding Gibson Homology
	JUND_Rarm_REV	caggaaacagctatgaccatgCTCGAGccaCAGAGGGAGGAGAGAAAGGC	Adding Gibson Homology
	JUN_gDNAL_FWD	CAAGAACTCGGACCTCCTCA	Amplification from gDNA
	JUN_gDNAL_REV	TGTTAGGTCCATGCAGTTCTTG	Amplification from gDNA
	JUN_gDNAR_FWD	TCAGACAGTGCCCGAGATG	Amplification from gDNA
	JUN_gDNAR_REV	GCAGAAAAGAGGTTAGGGGAGTA	Amplification from gDNA
	JUN_Larm_FWD	AacgacggccagtgaattcgagctcggtacAACGTGACAGATGAGCAGGA	Adding Gibson Homology
	JUN_LarmREV_FLAG	ATCACCTTTGTCATCATCATCTTTATAatcAAATGTTTGCAACTGCTGCGT	Adding Gibson Homology
	JUN_Rarm_FWD	GCTGGGGATGCGGTAGGCTCTATGGataacttcgtataatgtatgctatacgaagttatctAGAGAGACCGTCGGGGGC	Adding Gibson Homology
	JUN_Rarm_REV	caggaaacagctatgaccatgCTCGAGccaTGGTAAACTCAGAGTGCTCCA	Adding Gibson Homology
	FOSB_gDNAL_FWD	TCAACAAACCTCCTGCACAC	Amplification from gDNA
	FOSB_gDNAL_REV	GTTGACGTCAGAGAGCCAAC	Amplification from gDNA
	FOSB_gDNAR_FWD	CTGGCGGAGGTGAGAGATTT	Amplification from gDNA
	FOSB_gDNAR_REV	GGGCAGGGTCTTGGGATAAC	Amplification from gDNA
	FOSB_Larm_FWD	AacgacggccagtgaattcgagctcggtacCCATAAACCTGGCCCCTTCT	Adding Gibson Homology
	FOSB_LarmREV_FLAG	ATCACCTTTGTCATCATCATCTTTATAatcCAGAGCGAGGAGGGAGGGCGA	Adding Gibson Homology
	FOSB_Rarm_FWD	GCTGGGGATGCGGTAGGCTCTATGGataacttcgtataatgtatgctatacgaagttatctACTCTTTAGACACACAAAACAAAC	Adding Gibson Homology
	FOSB_Rarm_REV	caggaaacagctatgaccatgCTCGAGccaTTTCTGGGAGGGAGTGGCTA	Adding Gibson Homology
	FOSL1_gDNAL_FWD	TGGCTCACTGTGACATCTGT	Amplification from gDNA
	FOSL1_gDNAL_REV	TACAAAGTCTCTGGGCTGCC	Amplification from gDNA
	FOSL1_gDNAR_FWD	CACCGACCCATCTGCAAAAT	Amplification from gDNA
	FOSL1_gDNAR_REV	TGTCCAAGGTCATGCAGTGA	Amplification from gDNA
	FOSL1_Larm_FWD	AacgacggccagtgaattcgagctcggtacTAGTAGAGACGGGGTTTCGC	Adding Gibson Homology
	FOSL1_LarmREV_FLAG	ATCACCTTTGTCATCATCATCTTTATAatcCAAAGCGAGGAGGGTTGGAGA	Adding Gibson Homology
	FOSL1_Rarm_FWD	GCTGGGGATGCGGTAGGCTCTATGGataacttcgtataatgtatgctatacgaagttatctGGCGCCTGAGCCCTAC	Adding Gibson Homology
	FOSL1_Rarm_REV	caggaaacagctatgaccatgCTCGAGccaGGGCTCCAAATACTCTCCCA	Adding Gibson Homology
	FOSL2_gDNAL_FWD	CTGCAAAATGGGGCGATGAT	Amplification from gDNA
	FOSL2_gDNAL_REV	AGCCAGAGAGATGTCCAAGT	Amplification from gDNA
	FOSL2_gDNAR_FWD	CGCTGTAGTGGTGAAACAGG	Amplification from gDNA
	FOSL2_gDNAR_REV	CACTGTCTCACTCACACCCT	Amplification from gDNA
	FOSL2_Larm_FWD	AacgacggccagtgaattcgagctcggtacAGTAGGTGCTGGGTTATGGC	Adding Gibson Homology
	FOSL2_LarmREV_FLAG	ATCACCTTTGTCATCATCATCTTTATAatcCAGAGCCAGCAGAGTGGG	Adding Gibson Homology
	FOSL2_Rarm_FWD	GCTGGGGATGCGGTAGGCTCTATGGataacttcgtataatgtatgctatacgaagttatctCCCAGTGCACCTCCCTC	Adding Gibson Homology
	FOSL2_Rarm_REV	caggaaacagctatgaccatgCTCGAGccaCTCTGAGCCTCCCAGTGATG	Adding Gibson Homology
	JUNB_gDNAL_FWD	CGGCAGCTACTTTTCTGGTC	Amplification from gDNA
	JUNB_gDNAL_REV	CCCTCTTCCCCTCCCTGTTA	Amplification from gDNA
	JUNB_gDNAR_FWD	ACCAAGAGCGCATCAAAGTG	Amplification from gDNA
	JUNB_gDNAR_REV	GGGCAGAATCGGTCCTTGTA	Amplification from gDNA
	JUNB_Larm_FWD	AacgacggccagtgaattcgagctcggtacTCTCTCAAGCTCGCCTCTTC	Adding Gibson Homology
	JUNB_LarmREV_FLAG	ATCACCTTTGTCATCATCATCTTTATAatcGAAGGCGTGTCCCTTGACC	Adding Gibson Homology
	JUNB_Rarm_FWD	GCTGGGGATGCGGTAGGCTCTATGGataacttcgtataatgtatgctatacgaagttatctACGTCCCCTGCCCCTTTAC	Adding Gibson Homology
	JUNB_Rarm_REV	caggaaacagctatgaccatgCTCGAGccaCCTGCGCACTCCAAGTCT	Adding Gibson Homology
	FOS_gDNAL_FWD	AGGTACTCTGTGGGTTGCTC	Amplification from gDNA
	FOS_gDNAL_REV	AAAGAGACACAGACCCAGGC	Amplification from gDNA
	FOS_gDNAR_FWD	CTGTTCCCAGCATCATCCAG	Amplification from gDNA
	FOS_gDNAR_REV	AAAGAGCACAAGGTTGGTCG	Amplification from gDNA
	FOS_Larm_FWD	AacgacggccagtgaattcgagctcggtacAGATTGAGCATAAGGGCCCT	Adding Gibson Homology
	FOS_LarmREV_FLAG	ATCACCTTTGTCATCATCATCTTTATAatcCAGGGCCAGCAGCGTG	Adding Gibson Homology
	FOS_Rarm_FWD	GCTGGGGATGCGGTAGGCTCTATGGataacttcgtataatgtatgctatacgaagttatctGGGGGCAGGGAAGGG	Adding Gibson Homology
	FOS_Rarm_REV	caggaaacagctatgaccatgCTCGAGccaTCCACATGTCAAAAGACCTCA	Adding Gibson Homology
