# Supplementary material for: AP-1 subunits converge promiscuously at enhancers to potentiate transcription
Source: HighWire-hosted journal article supplement (doi:10.1101/gr.267898.120), 2021-03-05
Supplement: Supplemental_Table_S4.xlsx [file Supplemental_Table_S4.xlsx]

## Sheet: Table4
	Table 4, ChIP-seq data in K562
	File accession	File format	File type	File format type	Output type	Experiment accession	Assay	Biosample term id	Biosample term name	Biosample type	Biosample organism
	ENCFF001FWO	bam	bam		alignments	ENCSR000DWD	ChIP-seq	EFO:0002067	K562	cell line	Homo sapiens
	ENCFF001FWT	bam	bam		alignments	ENCSR000DWD	ChIP-seq	EFO:0002067	K562	cell line	Homo sapiens
	ENCFF001XGV	bed narrowPeak	bed	narrowPeak	peaks	ENCSR000DWD	ChIP-seq	EFO:0002067	K562	cell line	Homo sapiens
	ENCFF001XGW	bed narrowPeak	bed	narrowPeak	peaks	ENCSR000DWD	ChIP-seq	EFO:0002067	K562	cell line	Homo sapiens
	ENCFF185YRK	bam	bam		alignments	ENCSR000DWD	ChIP-seq	EFO:0002067	K562	cell line	Homo sapiens
	ENCFF458XJQ	bam	bam		unfiltered alignments	ENCSR000DWD	ChIP-seq	EFO:0002067	K562	cell line	Homo sapiens
	ENCFF193AYD	bam	bam		unfiltered alignments	ENCSR000DWD	ChIP-seq	EFO:0002067	K562	cell line	Homo sapiens
	ENCFF955AMI	bam	bam		alignments	ENCSR000DWD	ChIP-seq	EFO:0002067	K562	cell line	Homo sapiens
	ENCFF709WNV	bed narrowPeak	bed	narrowPeak	peaks	ENCSR000DWD	ChIP-seq	EFO:0002067	K562	cell line	Homo sapiens
	ENCFF537XMF	bed narrowPeak	bed	narrowPeak	peaks	ENCSR000DWD	ChIP-seq	EFO:0002067	K562	cell line	Homo sapiens
	ENCFF862MSZ	bed narrowPeak	bed	narrowPeak	peaks	ENCSR000DWD	ChIP-seq	EFO:0002067	K562	cell line	Homo sapiens
	ENCFF148POZ	bed narrowPeak	bed	narrowPeak	replicated peaks	ENCSR000DWD	ChIP-seq	EFO:0002067	K562	cell line	Homo sapiens
	ENCFF596MYV	bam	bam		unfiltered alignments	ENCSR000DWD	ChIP-seq	EFO:0002067	K562	cell line	Homo sapiens
	ENCFF915MJO	bam	bam		alignments	ENCSR000DWD	ChIP-seq	EFO:0002067	K562	cell line	Homo sapiens
	ENCFF520CGL	bam	bam		unfiltered alignments	ENCSR000DWD	ChIP-seq	EFO:0002067	K562	cell line	Homo sapiens
	ENCFF367FNL	bam	bam		alignments	ENCSR000DWD	ChIP-seq	EFO:0002067	K562	cell line	Homo sapiens
	ENCFF698RHA	bed narrowPeak	bed	narrowPeak	peaks	ENCSR000DWD	ChIP-seq	EFO:0002067	K562	cell line	Homo sapiens
	ENCFF779FUO	bed narrowPeak	bed	narrowPeak	peaks	ENCSR000DWD	ChIP-seq	EFO:0002067	K562	cell line	Homo sapiens
	ENCFF801WND	bed narrowPeak	bed	narrowPeak	peaks	ENCSR000DWD	ChIP-seq	EFO:0002067	K562	cell line	Homo sapiens
	ENCFF378OQB	bed narrowPeak	bed	narrowPeak	replicated peaks	ENCSR000DWD	ChIP-seq	EFO:0002067	K562	cell line	Homo sapiens
	ENCFF000BXK	bam	bam		alignments	ENCSR000AKS	ChIP-seq	EFO:0002067	K562	cell line	Homo sapiens
	ENCFF000BXL	bam	bam		alignments	ENCSR000AKS	ChIP-seq	EFO:0002067	K562	cell line	Homo sapiens
	ENCFF130RCQ	bam	bam		unfiltered alignments	ENCSR000AKS	ChIP-seq	EFO:0002067	K562	cell line	Homo sapiens
	ENCFF778EZR	bam	bam		alignments	ENCSR000AKS	ChIP-seq	EFO:0002067	K562	cell line	Homo sapiens
	ENCFF352XJQ	bam	bam		unfiltered alignments	ENCSR000AKS	ChIP-seq	EFO:0002067	K562	cell line	Homo sapiens
	ENCFF580LGK	bam	bam		alignments	ENCSR000AKS	ChIP-seq	EFO:0002067	K562	cell line	Homo sapiens
	ENCFF441FTY	bam	bam		unfiltered alignments	ENCSR000AKS	ChIP-seq	EFO:0002067	K562	cell line	Homo sapiens
	ENCFF798WDB	bam	bam		alignments	ENCSR000AKS	ChIP-seq	EFO:0002067	K562	cell line	Homo sapiens
	ENCFF213ZYR	bam	bam		alignments	ENCSR000AKS	ChIP-seq	EFO:0002067	K562	cell line	Homo sapiens
	ENCFF367JRB	bam	bam		unfiltered alignments	ENCSR000AKS	ChIP-seq	EFO:0002067	K562	cell line	Homo sapiens
	ENCFF721YQO	bed narrowPeak	bed	narrowPeak	peaks	ENCSR000AKS	ChIP-seq	EFO:0002067	K562	cell line	Homo sapiens
	ENCFF586SUS	bed narrowPeak	bed	narrowPeak	peaks	ENCSR000AKS	ChIP-seq	EFO:0002067	K562	cell line	Homo sapiens
	ENCFF254UHS	bed narrowPeak	bed	narrowPeak	peaks	ENCSR000AKS	ChIP-seq	EFO:0002067	K562	cell line	Homo sapiens
	ENCFF183UQD	bed narrowPeak	bed	narrowPeak	replicated peaks	ENCSR000AKS	ChIP-seq	EFO:0002067	K562	cell line	Homo sapiens
	ENCFF000BXS	bam	bam		alignments	ENCSR000AKT	ChIP-seq	EFO:0002067	K562	cell line	Homo sapiens
	ENCFF000BXT	bam	bam		alignments	ENCSR000AKT	ChIP-seq	EFO:0002067	K562	cell line	Homo sapiens
	ENCFF387KHL	bam	bam		unfiltered alignments	ENCSR000AKT	ChIP-seq	EFO:0002067	K562	cell line	Homo sapiens
	ENCFF198GBS	bam	bam		unfiltered alignments	ENCSR000AKT	ChIP-seq	EFO:0002067	K562	cell line	Homo sapiens
	ENCFF408XXB	bam	bam		alignments	ENCSR000AKT	ChIP-seq	EFO:0002067	K562	cell line	Homo sapiens
	ENCFF475HIM	bam	bam		alignments	ENCSR000AKT	ChIP-seq	EFO:0002067	K562	cell line	Homo sapiens
	ENCFF500CHD	bam	bam		unfiltered alignments	ENCSR000AKT	ChIP-seq	EFO:0002067	K562	cell line	Homo sapiens
	ENCFF319NDD	bam	bam		unfiltered alignments	ENCSR000AKT	ChIP-seq	EFO:0002067	K562	cell line	Homo sapiens
	ENCFF010SKB	bam	bam		alignments	ENCSR000AKT	ChIP-seq	EFO:0002067	K562	cell line	Homo sapiens
	ENCFF773VGC	bam	bam		alignments	ENCSR000AKT	ChIP-seq	EFO:0002067	K562	cell line	Homo sapiens
	ENCFF672WGZ	bed narrowPeak	bed	narrowPeak	peaks	ENCSR000AKT	ChIP-seq	EFO:0002067	K562	cell line	Homo sapiens
	ENCFF627TIZ	bed narrowPeak	bed	narrowPeak	peaks	ENCSR000AKT	ChIP-seq	EFO:0002067	K562	cell line	Homo sapiens
	ENCFF626TOQ	bed narrowPeak	bed	narrowPeak	peaks	ENCSR000AKT	ChIP-seq	EFO:0002067	K562	cell line	Homo sapiens
	ENCFF565KKR	bed narrowPeak	bed	narrowPeak	peaks	ENCSR000AKT	ChIP-seq	EFO:0002067	K562	cell line	Homo sapiens
	ENCFF390XFA	bed narrowPeak	bed	narrowPeak	peaks	ENCSR000AKT	ChIP-seq	EFO:0002067	K562	cell line	Homo sapiens
	ENCFF104FIT	bed narrowPeak	bed	narrowPeak	peaks	ENCSR000AKT	ChIP-seq	EFO:0002067	K562	cell line	Homo sapiens
	ENCFF099LMD	bed narrowPeak	bed	narrowPeak	replicated peaks	ENCSR000AKT	ChIP-seq	EFO:0002067	K562	cell line	Homo sapiens
	ENCFF118PIE	bed narrowPeak	bed	narrowPeak	replicated peaks	ENCSR000AKT	ChIP-seq	EFO:0002067	K562	cell line	Homo sapiens
	ENCFF000BXW	bam	bam		alignments	ENCSR000AKU	ChIP-seq	EFO:0002067	K562	cell line	Homo sapiens
	ENCFF000BXZ	bam	bam		alignments	ENCSR000AKU	ChIP-seq	EFO:0002067	K562	cell line	Homo sapiens
	ENCFF633WWH	bam	bam		alignments	ENCSR000AKU	ChIP-seq	EFO:0002067	K562	cell line	Homo sapiens
	ENCFF197VMR	bam	bam		unfiltered alignments	ENCSR000AKU	ChIP-seq	EFO:0002067	K562	cell line	Homo sapiens
	ENCFF100UHB	bam	bam		unfiltered alignments	ENCSR000AKU	ChIP-seq	EFO:0002067	K562	cell line	Homo sapiens
	ENCFF777LZD	bam	bam		alignments	ENCSR000AKU	ChIP-seq	EFO:0002067	K562	cell line	Homo sapiens
	ENCFF013BAH	bam	bam		unfiltered alignments	ENCSR000AKU	ChIP-seq	EFO:0002067	K562	cell line	Homo sapiens
	ENCFF823KRP	bam	bam		unfiltered alignments	ENCSR000AKU	ChIP-seq	EFO:0002067	K562	cell line	Homo sapiens
	ENCFF804NBY	bam	bam		alignments	ENCSR000AKU	ChIP-seq	EFO:0002067	K562	cell line	Homo sapiens
	ENCFF681JQI	bam	bam		alignments	ENCSR000AKU	ChIP-seq	EFO:0002067	K562	cell line	Homo sapiens
	ENCFF406QTB	bed narrowPeak	bed	narrowPeak	peaks	ENCSR000AKU	ChIP-seq	EFO:0002067	K562	cell line	Homo sapiens
	ENCFF314GKM	bed narrowPeak	bed	narrowPeak	peaks	ENCSR000AKU	ChIP-seq	EFO:0002067	K562	cell line	Homo sapiens
	ENCFF507QPR	bed narrowPeak	bed	narrowPeak	peaks	ENCSR000AKU	ChIP-seq	EFO:0002067	K562	cell line	Homo sapiens
	ENCFF127XXD	bed narrowPeak	bed	narrowPeak	replicated peaks	ENCSR000AKU	ChIP-seq	EFO:0002067	K562	cell line	Homo sapiens
	ENCFF860DEC	bed narrowPeak	bed	narrowPeak	peaks	ENCSR000AKU	ChIP-seq	EFO:0002067	K562	cell line	Homo sapiens
	ENCFF500EUY	bed narrowPeak	bed	narrowPeak	peaks	ENCSR000AKU	ChIP-seq	EFO:0002067	K562	cell line	Homo sapiens
	ENCFF251TOG	bed narrowPeak	bed	narrowPeak	peaks	ENCSR000AKU	ChIP-seq	EFO:0002067	K562	cell line	Homo sapiens
	ENCFF909PMV	bed narrowPeak	bed	narrowPeak	replicated peaks	ENCSR000AKU	ChIP-seq	EFO:0002067	K562	cell line	Homo sapiens
	ENCFF000VDH	bam	bam		alignments	ENCSR000EWC	ChIP-seq	EFO:0002067	K562	cell line	Homo sapiens
	ENCFF000VDJ	bam	bam		alignments	ENCSR000EWC	ChIP-seq	EFO:0002067	K562	cell line	Homo sapiens
	ENCFF001VCQ	bed narrowPeak	bed	narrowPeak	peaks	ENCSR000EWC	ChIP-seq	EFO:0002067	K562	cell line	Homo sapiens
	ENCFF290LQY	bam	bam		alignments	ENCSR000EWC	ChIP-seq	EFO:0002067	K562	cell line	Homo sapiens
	ENCFF492KZX	bam	bam		unfiltered alignments	ENCSR000EWC	ChIP-seq	EFO:0002067	K562	cell line	Homo sapiens
	ENCFF063EDR	bam	bam		alignments	ENCSR000EWC	ChIP-seq	EFO:0002067	K562	cell line	Homo sapiens
	ENCFF538HAQ	bam	bam		unfiltered alignments	ENCSR000EWC	ChIP-seq	EFO:0002067	K562	cell line	Homo sapiens
	ENCFF971OQL	bed narrowPeak	bed	narrowPeak	peaks	ENCSR000EWC	ChIP-seq	EFO:0002067	K562	cell line	Homo sapiens
	ENCFF501DZN	bed narrowPeak	bed	narrowPeak	peaks	ENCSR000EWC	ChIP-seq	EFO:0002067	K562	cell line	Homo sapiens
	ENCFF159VKJ	bed narrowPeak	bed	narrowPeak	replicated peaks	ENCSR000EWC	ChIP-seq	EFO:0002067	K562	cell line	Homo sapiens
	ENCFF712TSU	bed narrowPeak	bed	narrowPeak	peaks	ENCSR000EWC	ChIP-seq	EFO:0002067	K562	cell line	Homo sapiens
	ENCFF214WHM	bam	bam		unfiltered alignments	ENCSR000EWC	ChIP-seq	EFO:0002067	K562	cell line	Homo sapiens
	ENCFF825PKH	bam	bam		alignments	ENCSR000EWC	ChIP-seq	EFO:0002067	K562	cell line	Homo sapiens
	ENCFF914PQZ	bed narrowPeak	bed	narrowPeak	peaks	ENCSR000EWC	ChIP-seq	EFO:0002067	K562	cell line	Homo sapiens
	ENCFF078UPL	bed narrowPeak	bed	narrowPeak	peaks	ENCSR000EWC	ChIP-seq	EFO:0002067	K562	cell line	Homo sapiens
	ENCFF730VTO	bed narrowPeak	bed	narrowPeak	replicated peaks	ENCSR000EWC	ChIP-seq	EFO:0002067	K562	cell line	Homo sapiens
	ENCFF196QGZ	bam	bam		alignments	ENCSR000EWC	ChIP-seq	EFO:0002067	K562	cell line	Homo sapiens
	ENCFF564QIG	bed narrowPeak	bed	narrowPeak	peaks	ENCSR000EWC	ChIP-seq	EFO:0002067	K562	cell line	Homo sapiens
	ENCFF091ZZZ	bam	bam		unfiltered alignments	ENCSR000EWC	ChIP-seq	EFO:0002067	K562	cell line	Homo sapiens
	ENCFF000BWX	bam	bam		alignments	ENCSR000AKP	ChIP-seq	EFO:0002067	K562	cell line	Homo sapiens
	ENCFF000BWZ	bam	bam		alignments	ENCSR000AKP	ChIP-seq	EFO:0002067	K562	cell line	Homo sapiens
	ENCFF465RQO	bam	bam		unfiltered alignments	ENCSR000AKP	ChIP-seq	EFO:0002067	K562	cell line	Homo sapiens
	ENCFF301TVL	bam	bam		alignments	ENCSR000AKP	ChIP-seq	EFO:0002067	K562	cell line	Homo sapiens
	ENCFF755BDE	bam	bam		unfiltered alignments	ENCSR000AKP	ChIP-seq	EFO:0002067	K562	cell line	Homo sapiens
	ENCFF879BWC	bam	bam		alignments	ENCSR000AKP	ChIP-seq	EFO:0002067	K562	cell line	Homo sapiens
	ENCFF252DWA	bed narrowPeak	bed	narrowPeak	peaks	ENCSR000AKP	ChIP-seq	EFO:0002067	K562	cell line	Homo sapiens
	ENCFF240QQW	bed narrowPeak	bed	narrowPeak	peaks	ENCSR000AKP	ChIP-seq	EFO:0002067	K562	cell line	Homo sapiens
	ENCFF675ADR	bed narrowPeak	bed	narrowPeak	peaks	ENCSR000AKP	ChIP-seq	EFO:0002067	K562	cell line	Homo sapiens
	ENCFF437DPT	bed narrowPeak	bed	narrowPeak	peaks	ENCSR000AKP	ChIP-seq	EFO:0002067	K562	cell line	Homo sapiens
	ENCFF038DDS	bed narrowPeak	bed	narrowPeak	replicated peaks	ENCSR000AKP	ChIP-seq	EFO:0002067	K562	cell line	Homo sapiens
	ENCFF244ZLG	bed narrowPeak	bed	narrowPeak	peaks	ENCSR000AKP	ChIP-seq	EFO:0002067	K562	cell line	Homo sapiens
	ENCFF992MUX	bam	bam		unfiltered alignments	ENCSR000AKP	ChIP-seq	EFO:0002067	K562	cell line	Homo sapiens
	ENCFF870ZYG	bam	bam		unfiltered alignments	ENCSR000AKP	ChIP-seq	EFO:0002067	K562	cell line	Homo sapiens
	ENCFF070PWH	bam	bam		alignments	ENCSR000AKP	ChIP-seq	EFO:0002067	K562	cell line	Homo sapiens
	ENCFF384ZZM	bam	bam		alignments	ENCSR000AKP	ChIP-seq	EFO:0002067	K562	cell line	Homo sapiens
	ENCFF044JNJ	bed narrowPeak	bed	narrowPeak	replicated peaks	ENCSR000AKP	ChIP-seq	EFO:0002067	K562	cell line	Homo sapiens
	ENCFF702CFZ	bed narrowPeak	bed	narrowPeak	peaks	ENCSR000AKP	ChIP-seq	EFO:0002067	K562	cell line	Homo sapiens
	ENCFF931VAQ	bed narrowPeak	bed	narrowPeak	peaks	ENCSR000AKP	ChIP-seq	EFO:0002067	K562	cell line	Homo sapiens
	ENCFF578UBP	bed narrowPeak	bed	narrowPeak	peaks	ENCSR000AKP	ChIP-seq	EFO:0002067	K562	cell line	Homo sapiens
	ENCFF000VDL	bam	bam		alignments	ENCSR000EWA	ChIP-seq	EFO:0002067	K562	cell line	Homo sapiens
	ENCFF000VDM	bam	bam		alignments	ENCSR000EWA	ChIP-seq	EFO:0002067	K562	cell line	Homo sapiens
	ENCFF001VCR	bed narrowPeak	bed	narrowPeak	peaks	ENCSR000EWA	ChIP-seq	EFO:0002067	K562	cell line	Homo sapiens
	ENCFF411WVM	bam	bam		unfiltered alignments	ENCSR000EWA	ChIP-seq	EFO:0002067	K562	cell line	Homo sapiens
	ENCFF706SCF	bam	bam		alignments	ENCSR000EWA	ChIP-seq	EFO:0002067	K562	cell line	Homo sapiens
	ENCFF611YPB	bam	bam		alignments	ENCSR000EWA	ChIP-seq	EFO:0002067	K562	cell line	Homo sapiens
	ENCFF184FII	bam	bam		unfiltered alignments	ENCSR000EWA	ChIP-seq	EFO:0002067	K562	cell line	Homo sapiens
	ENCFF456GWP	bam	bam		unfiltered alignments	ENCSR000EWA	ChIP-seq	EFO:0002067	K562	cell line	Homo sapiens
	ENCFF103DJN	bam	bam		unfiltered alignments	ENCSR000EWA	ChIP-seq	EFO:0002067	K562	cell line	Homo sapiens
	ENCFF792ZLC	bam	bam		alignments	ENCSR000EWA	ChIP-seq	EFO:0002067	K562	cell line	Homo sapiens
	ENCFF742FDS	bam	bam		alignments	ENCSR000EWA	ChIP-seq	EFO:0002067	K562	cell line	Homo sapiens
	ENCFF112BHN	bed narrowPeak	bed	narrowPeak	peaks	ENCSR000EWA	ChIP-seq	EFO:0002067	K562	cell line	Homo sapiens
	ENCFF337VUR	bed narrowPeak	bed	narrowPeak	peaks	ENCSR000EWA	ChIP-seq	EFO:0002067	K562	cell line	Homo sapiens
	ENCFF645GPE	bed narrowPeak	bed	narrowPeak	peaks	ENCSR000EWA	ChIP-seq	EFO:0002067	K562	cell line	Homo sapiens
	ENCFF961SPZ	bed narrowPeak	bed	narrowPeak	replicated peaks	ENCSR000EWA	ChIP-seq	EFO:0002067	K562	cell line	Homo sapiens
	ENCFF955ZVN	bam	bam		alignments	ENCSR000EWA	ChIP-seq	EFO:0002067	K562	cell line	Homo sapiens
	ENCFF261REY	bed narrowPeak	bed	narrowPeak	peaks	ENCSR000EWA	ChIP-seq	EFO:0002067	K562	cell line	Homo sapiens
	ENCFF883POK	bed narrowPeak	bed	narrowPeak	replicated peaks	ENCSR000EWA	ChIP-seq	EFO:0002067	K562	cell line	Homo sapiens
	ENCFF821MIO	bam	bam		unfiltered alignments	ENCSR000EWA	ChIP-seq	EFO:0002067	K562	cell line	Homo sapiens
	ENCFF217HOS	bam	bam		alignments	ENCSR000EWA	ChIP-seq	EFO:0002067	K562	cell line	Homo sapiens
	ENCFF057JVO	bam	bam		unfiltered alignments	ENCSR000EWA	ChIP-seq	EFO:0002067	K562	cell line	Homo sapiens
	ENCFF757WPX	bed narrowPeak	bed	narrowPeak	peaks	ENCSR000EWA	ChIP-seq	EFO:0002067	K562	cell line	Homo sapiens
	ENCFF258PHY	bed narrowPeak	bed	narrowPeak	peaks	ENCSR000EWA	ChIP-seq	EFO:0002067	K562	cell line	Homo sapiens
	ENCFF236SNL	bam	bam		alignments	ENCSR668LDD	ChIP-seq	EFO:0002067	K562	cell line	Homo sapiens
	ENCFF051QSU	bam	bam		unfiltered alignments	ENCSR668LDD	ChIP-seq	EFO:0002067	K562	cell line	Homo sapiens
	ENCFF189RDG	bam	bam		unfiltered alignments	ENCSR668LDD	ChIP-seq	EFO:0002067	K562	cell line	Homo sapiens
	ENCFF661UGK	bam	bam		alignments	ENCSR668LDD	ChIP-seq	EFO:0002067	K562	cell line	Homo sapiens
	ENCFF978AZB	bam	bam		unfiltered alignments	ENCSR668LDD	ChIP-seq	EFO:0002067	K562	cell line	Homo sapiens
	ENCFF572OAS	bam	bam		alignments	ENCSR668LDD	ChIP-seq	EFO:0002067	K562	cell line	Homo sapiens
	ENCFF144WEV	bam	bam		unfiltered alignments	ENCSR668LDD	ChIP-seq	EFO:0002067	K562	cell line	Homo sapiens
	ENCFF407UPO	bam	bam		alignments	ENCSR668LDD	ChIP-seq	EFO:0002067	K562	cell line	Homo sapiens
	ENCFF084PQN	bed narrowPeak	bed	narrowPeak	peaks	ENCSR668LDD	ChIP-seq	EFO:0002067	K562	cell line	Homo sapiens
	ENCFF282LNM	bed narrowPeak	bed	narrowPeak	peaks	ENCSR668LDD	ChIP-seq	EFO:0002067	K562	cell line	Homo sapiens
	ENCFF752ALB	bed narrowPeak	bed	narrowPeak	peaks	ENCSR668LDD	ChIP-seq	EFO:0002067	K562	cell line	Homo sapiens
	ENCFF737AMS	bed narrowPeak	bed	narrowPeak	replicated peaks	ENCSR668LDD	ChIP-seq	EFO:0002067	K562	cell line	Homo sapiens
	ENCFF843VDV	bed narrowPeak	bed	narrowPeak	peaks	ENCSR668LDD	ChIP-seq	EFO:0002067	K562	cell line	Homo sapiens
	ENCFF381XPC	bed narrowPeak	bed	narrowPeak	peaks	ENCSR668LDD	ChIP-seq	EFO:0002067	K562	cell line	Homo sapiens
	ENCFF999RPS	bed narrowPeak	bed	narrowPeak	peaks	ENCSR668LDD	ChIP-seq	EFO:0002067	K562	cell line	Homo sapiens
	ENCFF616DLO	bed narrowPeak	bed	narrowPeak	replicated peaks	ENCSR668LDD	ChIP-seq	EFO:0002067	K562	cell line	Homo sapiens
